# Supplementary material
Source: ML conference proceedings conference paper supplement (https://openaccess.thecvf.com/content/WACV2025/html/Zoomers_PRoGS_Progressive_Rendering_WACV_2025_paper.html)
Supplement: Supplementary file 1 [file Zoomers_PRoGS_Progressive_Rendering_WACV_2025_supplemental.zip]

## Supplementary: PProGS: Progressive Rendering of Gaussian Splats

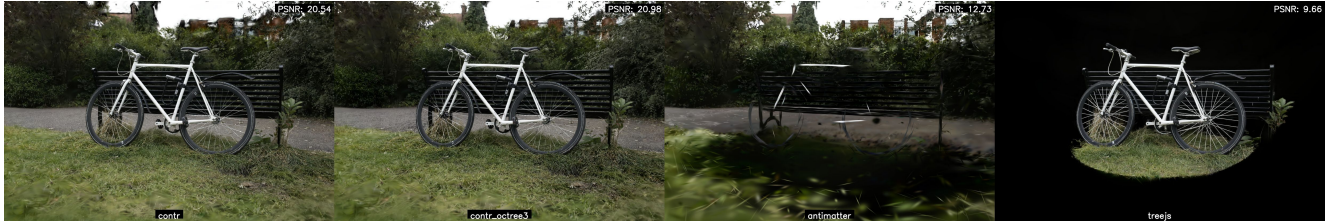

Figure 1. Comparison of 10% of splats for 4 different methods - Bicycle scene.

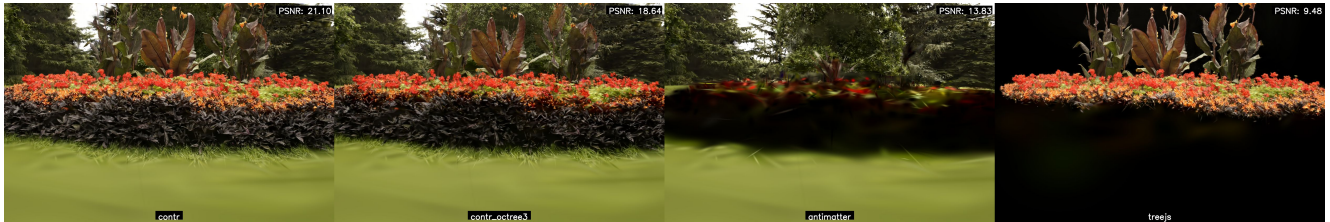

Figure 2. Comparison of 10% of splats for 4 different methods - Flowers scene.

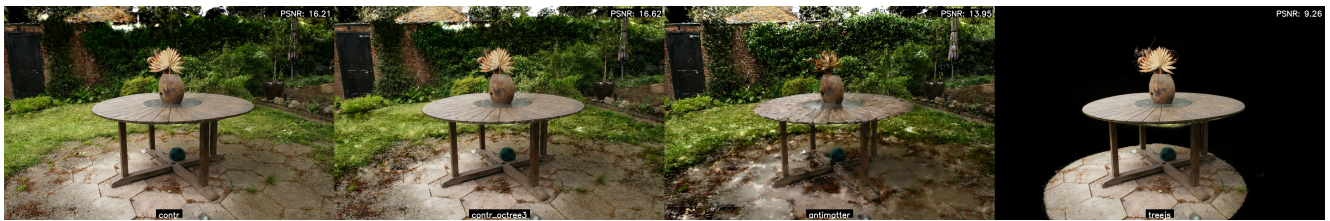

Figure 3. Comparison of 10% of splats for 4 different methods - Garden scene.

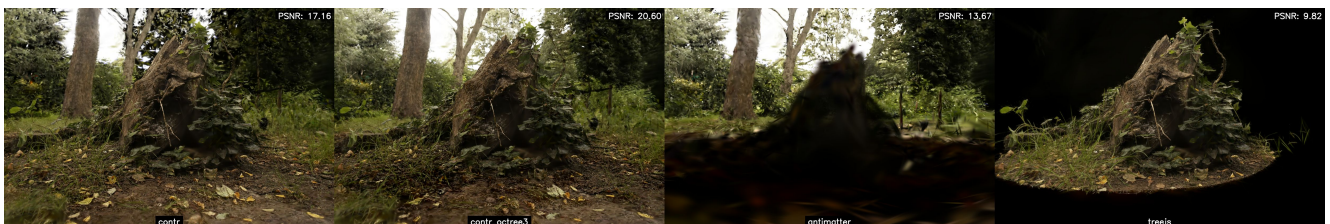

Figure 4. Comparison of 10% of splats for 4 different methods - Stump scene.

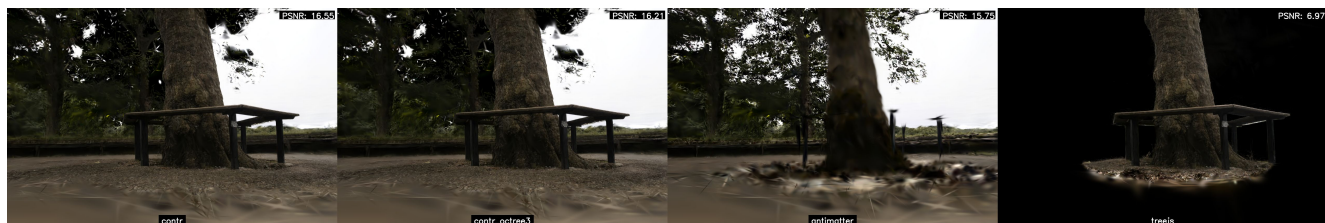

Figure 5. Comparison of 10% of splats for 4 different methods - Treehill scene.

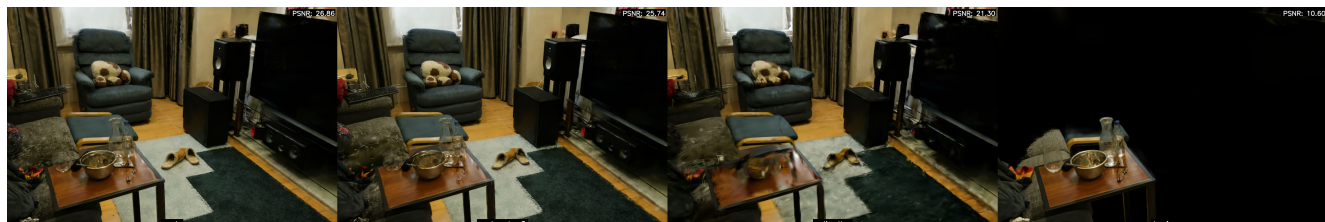

Figure 6. Comparison of 10% of splats for 4 different methods - Room scene.

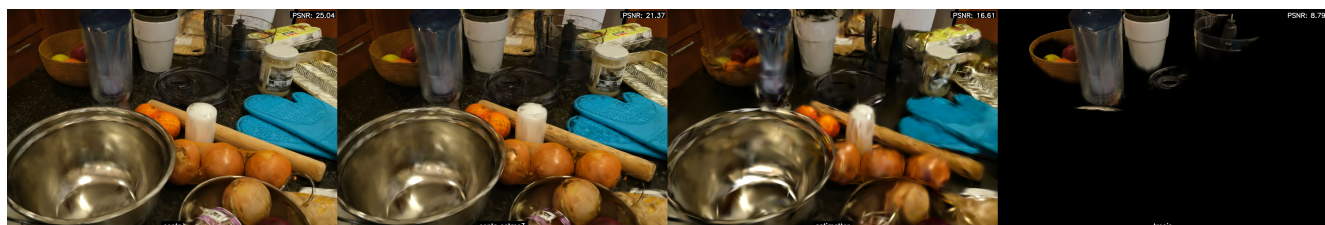

Figure 7. Comparison of 10% of splats for 4 different methods - Counter scene.

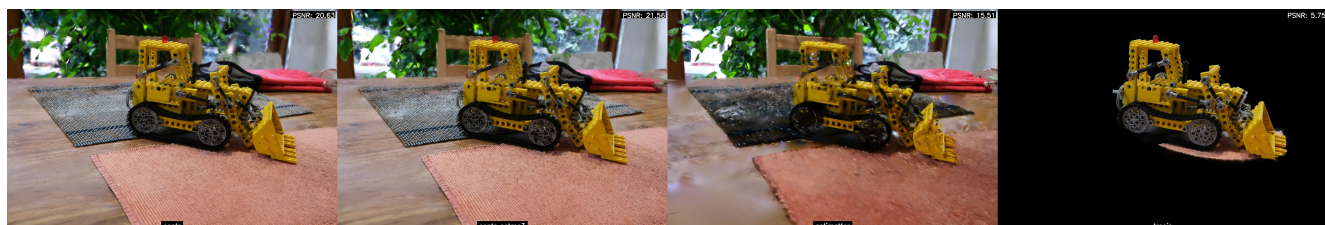

Figure 8. Comparison of 10% of splats for 4 different methods - Kitchen scene.

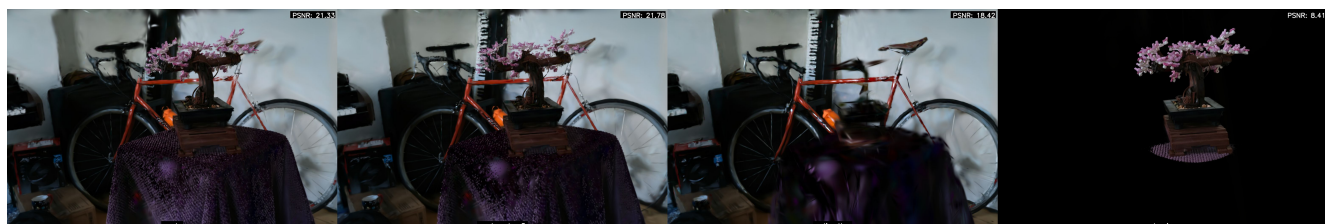

Figure 9. Comparison of 10% of splats for 4 different methods - Bonsai scene.



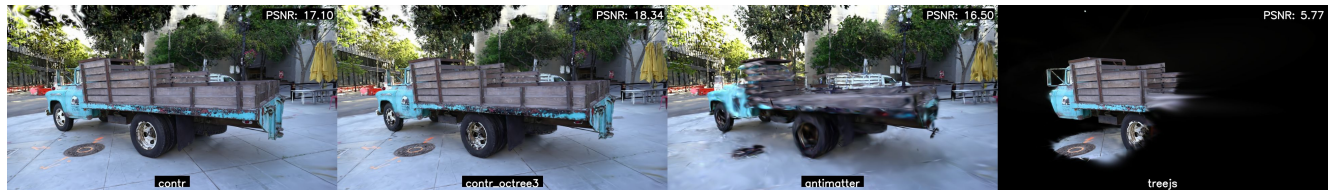

Figure 10. Comparison of 10% of splats for 4 different methods - Truck scene.

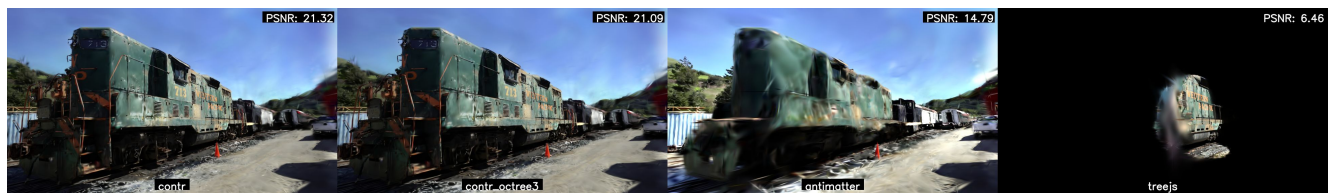

Figure 11. Comparison of 10% of splats for 4 different methods - Train scene.

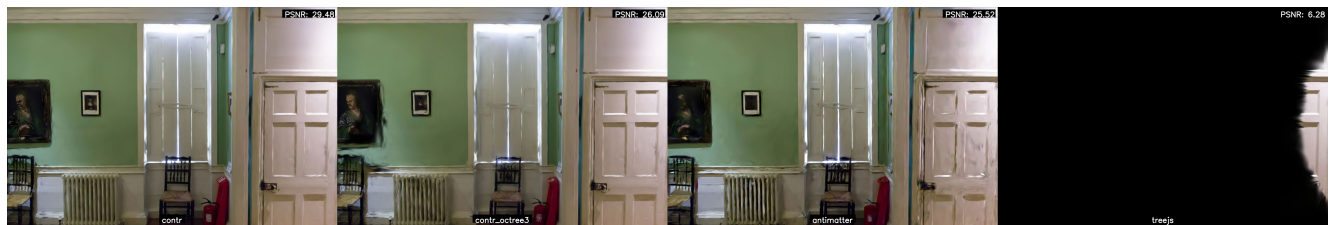

Figure 12. Comparison of 10% of splats for 4 different methods - Dr. Johnson scene.

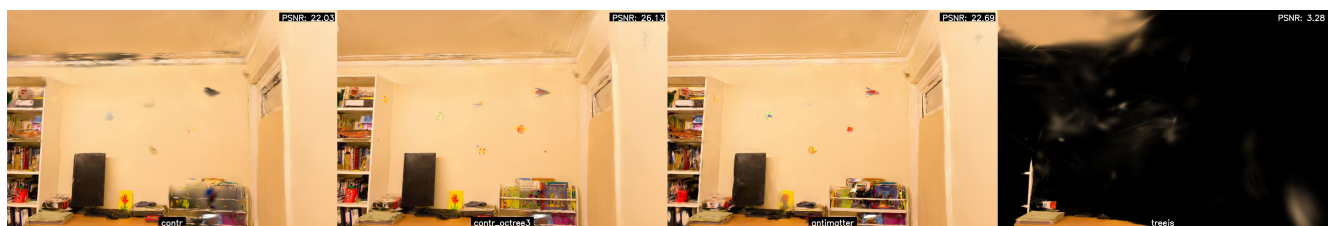

Figure 13. Comparison of 10% of splats for 4 different methods - Playroom scene.

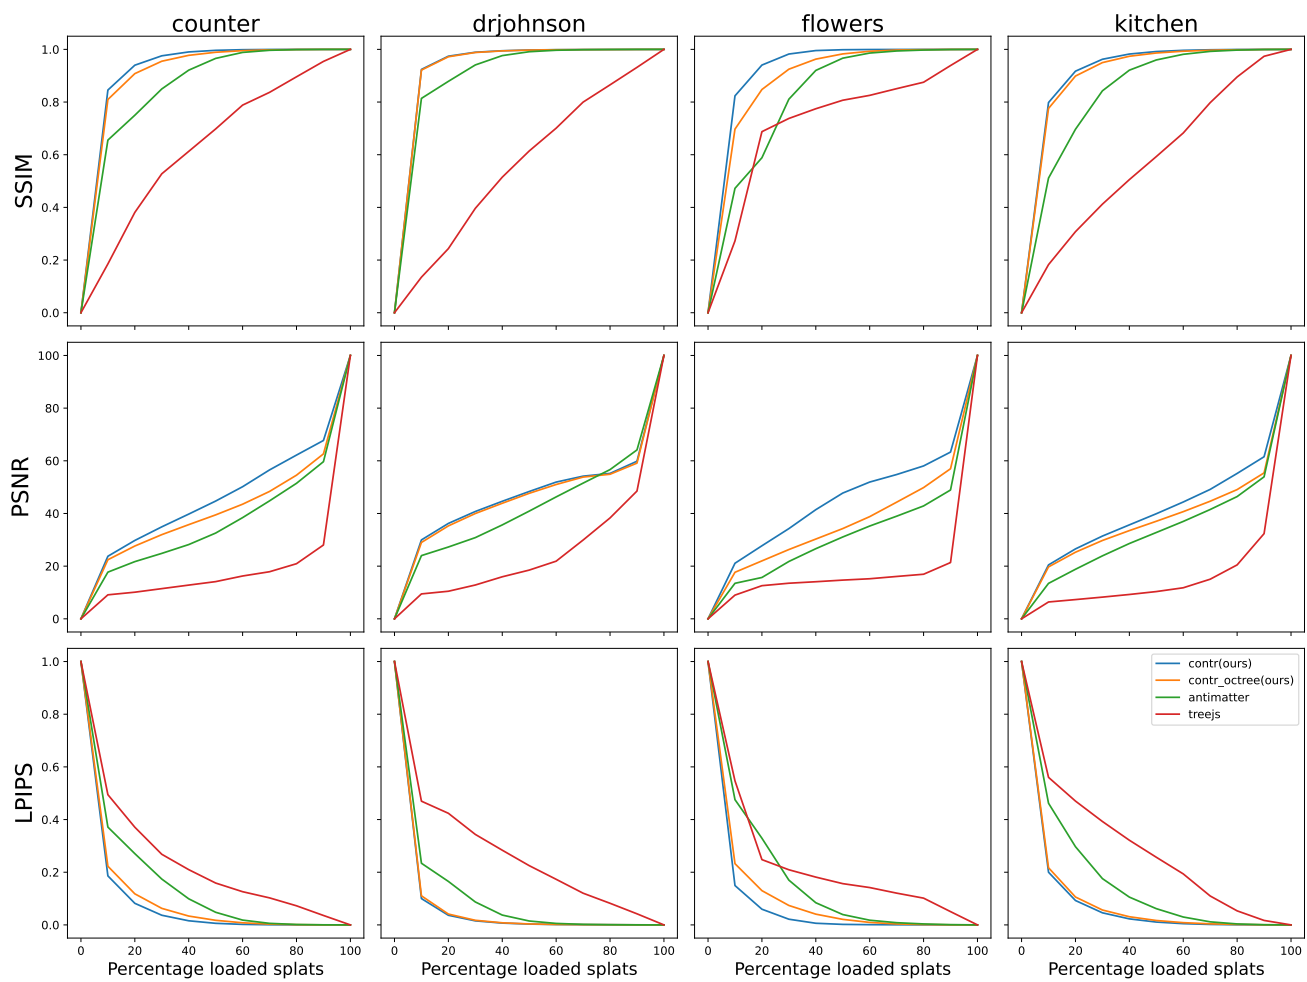

Figure 14. Metrics per 10% - Counter, DrJohnson, Flowers, Kitchen scenes.(PSNR $\uparrow$ , SSIM $\uparrow$ , LPIPS $\downarrow$ )

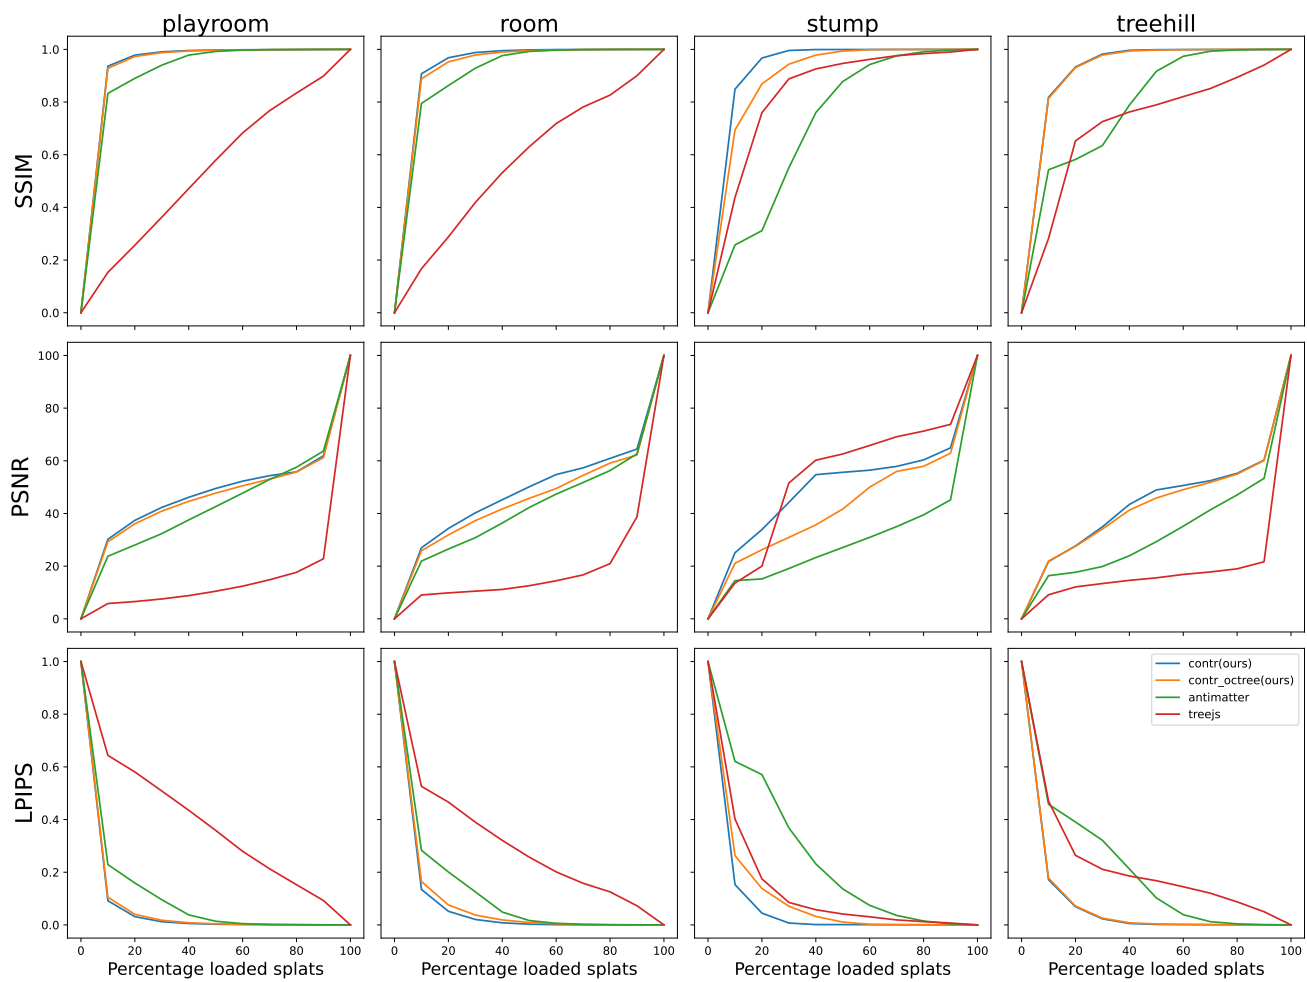

Figure 15. Metrics per 10% - Playroom, Room, Stump, Treehill scenes.(PSNR $\uparrow$ , SSIM $\uparrow$ , LPIPS $\downarrow$ )

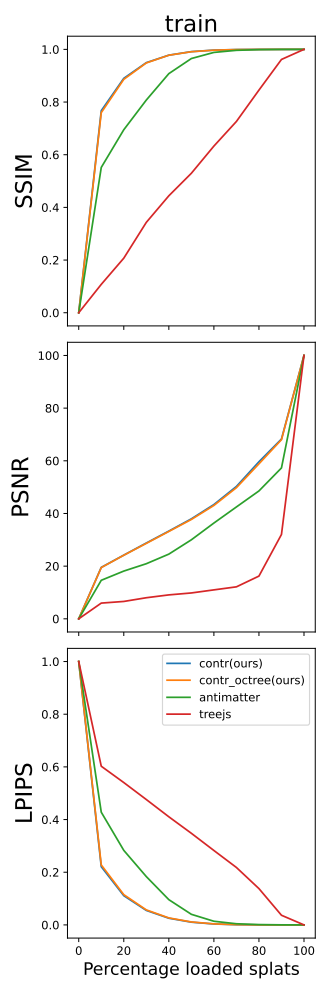

Figure 16. Metrics per 10% - Train scene.(PSNR $\uparrow$ , SSIM $\uparrow$ , LPIPS $\downarrow$ )
